# Supplementary material for: Malpighian tubules of Rhodnius prolixus: More than post-prandial diuresis
Source: Front Insect Sci. 2023 Mar 30;3:1167889. doi: 10.3389/finsc.2023.1167889 (PMC10926411; doi:10.3389/finsc.2023.1167889)
Supplement: Supplementary file 3 [file DataSheet_3.xlsx]

## Sheet: RNA-seq metric
Summary of RNA-seq metrics from R. prolixus transcriptomes for Malpighian tubules under unfed (UFC) and fed condition, 24 h post blood meal (24 h PBM)
Sample name	Raw reads	Clean reads	Raw bases (G)	Clean bases (G)	Error rate(%)	Q20(%)	Q30(%)	GC content(%)
MT_UFC1	20598864	20275008	6.2	6.1	0.03	97.53	93.02	36.71
MT_UFC2	21491756	21176315	6.4	6.4	0.03	97.44	92.83	36.73
MT_UFC3	20778291	20450436	6.2	6.1	0.03	97.18	92.33	36.77
MT_24 h PBM1	21432467	21124191	6.4	6.3	0.03	97.94	93.73	36.86
MT_24 h PBM2	21754577	21416935	6.5	6.4	0.03	97.32	92.55	36.79
MT_24 h PBM3	20098115	19822783	6	5.9	0.03	97.46	92.9	36.83
Supplementary Worksheet 2. RNA-seq metrics from R. prolixus transcriptomes and details of transcript expression in samples obtained from Malpighian tubules from unfed (UFC) insects and insects 24 h post blood meal (PBM). Columns are: the gene name we are assigning; VectorBase code – the official gene number in the RproC3 genome assembly; MT_UFC and MT_24 h PBM, the readcount after normalization; …

## Sheet: Immune Regulators
Immune Effector Molecules	VectorBase code	readcount_MT_24 h PBM	readcount_MT_UFC	log2FoldChange	padj	significant		Imd pathway	VectorBase code	readcount_MT_24 h PBM	readcount_MT_UFC	log2FoldChange	padj	significant
Melanization								Fas-associated Death Domain (FADD)	RPRC013858	143.352	323.491	-1.17721	5.25636e-12	TRUE
Prophenoloxidase (PPO)	RPRC012380	27.7246	40.976	-0.55639	0.389745	FALSE		Caspar	RPRC001459	684.145	1291.19	-0.91684	1.15876e-21	TRUE
Nitric oxide								Ubc13 (aka Bendless)	RPRC011790	687.735	448.028	0.617242	4.17424e-07	TRUE
Nitric Oxide Synthase (NOS)	RPRC003886	40.858	16.1847	1.33249	0.00996505	TRUE		Iap2	RPRC007068	132.563	90.5533	0.550139	0.0262859	TRUE
Reactive oxygen species								Ubc5 (aka Effete)	RPRC005317	1174.54	2361.7	-1.00842	1.16493e-33	TRUE
Duox (Dual oxidase)	RPRC004883	5.34815	5.76813	-0.118217	0.934646	FALSE		Relish	RPRC017358	474.771	357.022	0.410704	0.00377412	TRUE
NADPH oxidase 5 (Nox5)	RPRC008329	57.5788	65.9348	-0.196061	0.609023	FALSE		Tak1	RPRC014191	76.6594	75.938	0.0225329	0.950066	FALSE
Phospholipase C-β	RPRC014327	1096.71	1932.95	-0.818412	4.37433e-19	TRUE		Uev1A	RPRC011375	1418.47	1768.65	-0.318671	0.000121794	TRUE
Peptidoglycan binding proteins and Gram-negative bacteria-binding proteins
GNBP-like	RPRC003210	61.3796	7.13994	3.10492	0.105955	FALSE		Toll signaling pathway	VectorBase code	readcount_MT_24 h PBM	readcount_MT_UFC	log2FoldChange	padj	significant
								Cactus	RPRC017349	285.458	343.314	-0.265096	0.116699	FALSE
Antimicrobial peptides	VectorBase code	readcount_MT_24 h PBM	readcount_MT_UFC	log2FoldChange	padj	significant		Pelle	RPRC005685	298.683	318.19	-0.0925727	0.605514	FALSE
defensine A (DEF A)	RPRC012185	167.471	0.40916	8.55002	2.8534e-11	TRUE		Spz	RPRC002634	28.2758	13.0873	-1.10198	0.0523264	FALSE
defensine B (DEF B)	RPRC004803	457.54	0	10.9624	2.0754e-06	TRUE		Tube	RPRC005871	75.5395	107.097	-0.507258	0.0622581	FALSE
defensine C (DEF C)	RPRC012184	27.8672	2.48756	3.4822	0.00021087	TRUE		Dorsal	RPRC003790	14.8505	23.2343	-0.652039	0.26953	FALSE
Prolixicin	RPRC013002	498.628	33.7932	3.88359	2.02459e-06	TRUE		Myd88	RPRC009785	101.934	43.9241	1.214	7.59288e-05	TRUE
Lysozyme-A	RPRC015442	309.403	1260.32	-2.02841	4.69619e-43	TRUE		Persephone	RPRC010532	15.7887	38.7714	-1.29745	0.0115657	TRUE
Lysozyme-B	RPRC015440	115.644	8.39256	3.7868	0.00134512	TRUE		Spätzle	RPRC002634	13.0873	28.2758	-1.10198	0.0523264	FALSE
Lysozyme (fragement)	RPRC015441	ND	ND	ND	ND	ND
Lysozyme (fragement)	RPRC000905	3.23282	13.7568	-2.10498	0.0320584	TRUE		Jak-STAT signaling pathway	VectorBase code	readcount_MT_24 h PBM	readcount_MT_UFC	log2FoldChange	padj	significant
								Socs	RPRC002037	205.083	141.973	0.532145	0.0211687	TRUE
RNAi pathway related genes	VectorBase code	readcount_MT_24 h PBM	readcount_MT_UFC	log2FoldChange	padj	significant		Cbl	RPRC010957	88.5305	83.5885	0.0859456	0.730592	FALSE
Dicer family								Shp	RPRC004483	391.95	344.666	0.185199	0.211915	FALSE
Dicer I	RPRC002485	276.319	192.85	0.520363	0.00284355	TRUE		Pias	RPRC002055	209.624	215.069	-0.0359856	0.873798	FALSE
Dicer II	RPRC013872	788.52	433.594	0.863116	1.85068e-13	TRUE		Peroxidasin	RPRC004965	150.577	343.38	-1.18847	6.59654e-13	TRUE
Drosha	RPRC013112	499.297	276.412	0.853731	1.8454e-10	TRUE		Jak	RPRC012987	243.29	115.153	1.08066	9.65781e-09	TRUE
RISC components								Stat	RPRC006502	365.861	389.476	-0.0897604	0.589859	FALSE
Argonaute 1	RPRC013696	68.5958	82.9921	-0.273995	0.382209	FALSE		Cis	RPRC001962	751.837	92.8423	3.01555	1.45709e-65	TRUE
Argonaute 2	RPRC002460	496.494	223.3	1.0879	1.19367e-12	TRUE		Stam	RPRC015396	704.546	789.769	-0.164977	0.146884	FALSE
Argonaute 3	RPRC013054	103.633	83.8096	0.255394	0.390705	FALSE		LDHA	RPRC014947	37.8865	60.1813	-0.672471	0.0816055	FALSE
PIWI	RPRC000252	0.513887	0.391137	0.34003	1	FALSE		PDK-1	RPRC013269	644.862	481.227	0.421269	0.00152601	TRUE
Armitage	RPRC000215	181.875	187.89	-0.110518	0.618601	FALSE		PDH	RPRC010464	793.548	871.19	-0.134635	0.252511	FALSE
dsRBM-containing proteins								PDH	RPRC009715	160.35	228.467	-0.514151	0.0722453	FALSE
Loqs	RPRC000198	192.15	102.958	0.840508	2.90184e-05	TRUE		PDH	RPRC015074	715.368	482.905	0.566681	3.32015e-06	TRUE
R2D2	RPRC000119	465.853	1354.07	-1.15509	1.26e-09	TRUE		ANGPT	RPRC011478	5.57944	4.16192	0.418736	0.737969	FALSE
Pasha	RPRC000304	137.442	360.991	-1.45708	1.1122e-11	TRUE		PAI-1	RPRC004932	15.272	23.7173	-0.636656	0.290995	FALSE
								GLUT	RPRC014535	288.747	129.114	1.1609	1.23398e-11	TRUE
								Hexokinase1	RPRC003961	634.161	1712.54	-1.4334	4.9288e-52	TRUE
								PFKL	RPRC011744	1003.85	538.557	0.89883	5.62205e-16	TRUE
								Enolase (ENO)	RPRC013484	10999.1	30445.9	-1.46899	1.15528e-82	TRUE
								ALDOA	RPRC009816	6453.59	22600.5	-1.80839	2.35553e-77	TRUE
								PGK1	RPRC011161	1425.19	1555.7	-0.12668	0.286365	FALSE
								PFK2	RPRC005099	1014.19	1029.57	-0.02219	0.89331	FALSE

## Sheet: Xenobiotic Detoxification
Xenobiotic Detoxification Phase I	VectorBase code	readcount_MT_24 h PBM	readcount_MT_UFC	log2FoldChange	padj	significant
Carboxylesterase (CEs)
Acetylcholinesterase	RPRC000482	1627.65	1114.76	0.545481	0.000718362	TRUE
	RPRC003013	0.501768	4.14345	-3.00835	0.105319	FALSE
Esterase	RPRC007702	ND	ND	ND	ND	ND
	RPRC001592	90.9333	67.6439	0.427465	0.638531	FALSE
	RPRC008235	ND	ND	ND	ND	ND
	RPRC001239	0.244352	2.09096	-2.88838	0.293286	FALSE
	RPRC008217	ND	ND	ND	ND	ND
	RPRC004681	ND	ND	ND	ND	ND
	RPRC003564	7.75804	1.65589	2.22809	0.0815738	FALSE
	RPRC003565	ND	ND	ND	ND	ND
	RPRC010259	ND	ND	ND	ND	ND
	RPRC014627	ND	ND	ND	ND	ND
	RPRC010267	ND	ND	ND	ND	ND
	RPRC003566	0.501768	1.2475	-1.29355	1	FALSE
	RPRC010263	ND	ND	ND	ND	ND
	RPRC007696	34.4349	15.8368	1.12347	0.0266161	TRUE
	RPRC007700	1.04648	0.837564	0.326375	0.913025	FALSE
	RPRC010228	0.287294	0.409164	-0.663116	1	FALSE
	RPRC007698	1.54825	0	2.75823	0.277354	1
	RPRC010265	9.63143	8.30768	0.201351	0.866304	FALSE
	RPRC010268	0.574588	0	1.309	1	FALSE
	RPRC014623	3.58564	6.2203	-0.793496	0.541546	FALSE
	RPRC010260	ND	ND	ND	ND	ND
Xenobiotic Detoxification Phase II	VectorBase code	readcount_MT_24 h PBM	readcount_MT_UFC	log2FoldChange	padj	significant
UDP-glucuronosyltransferases (UGTs)	RPRC015029	1233.84	2876.43	-1.22189	1.61698e-29	TRUE
	RPRC015024	10502.1	35929.8	-1.77458	1.44112e-112	TRUE
	RPRC015247	0.257416	0.830895	-1.55875	1	FALSE
Glutathione S-transferases (GSTs)
Theta	RPRC009138	0.574588	0.409164	0.34015	1	FALSE
Theta	RPRC009617	117.055	68.5877	0.770042	0.00232618	TRUE
Theta	RPRC010411	ND	ND	ND	ND	ND
Theta	RPRC009358	1283.78	633.339	1.01904	3.26986e-25	TRUE
Sigma	RPRC010609	4241.81	591.546	2.84197	2.03968e-213	TRUE
Sigma	RPRC009365	197.366	93.7418	1.07652	2.80502e-06	TRUE
Sigma	RPRC002917	4804.43	698.732	2.78127	4.21496e-169	TRUE
Sigma	RPRC011128	1070.59	1160.55	-0.116469	0.287372	FALSE
Sigma	RPRC011244	ND	ND	ND	ND	ND
Sigma	RPRC015269	38233.5	41926.3	-0.13305	0.160278	FALSE
Sigma	RPRC007353	417.567	488.646	-0.228132	0.0976177	TRUE
Omega	RPRC007741	1478.99	2999.35	-1.12696	8.88027e-45	TRUE
Zeta	RPRC014626	1447.38	1887.55	-0.383799	2.87546e-05	TRUE
Delta	RPRC013179	ND	ND	ND	ND	ND
microsomal	RPRC001773	810.664	280.818	1.52968	2.54398e-40	TRUE
Epoxide hydrolase (EHs)	RPRC012150	7466.47	25855.6	-1.79216	1.41855e-78	TRUE
	RPRC002123	356.123	184.23	0.950014	6.11904e-08	TRUE
	RPRC009604	7711.38	5790.83	0.413175	2.27676e-07	TRUE
RPRC010422	1707.18	8242.56	-2.27181	8.75161e-253	TRUE
RPRC013677	507.825	375.935	0.434814	0.00199924	TRUE
RPRC007159	2525.87	1759.22	0.521928	5.90396e-10	TRUE
RPRC006529	13.9156	4.14268	1.74986	0.0483223	TRUE
RPRC004893	687.037	9078.06	-3.72396	0	TRUE
RPRC013633	407.12	180.781	1.17074	1.02072e-14	TRUE

## Sheet: Cytochrome P450
Cytochrome P450 genes	VectorBase code	readcount_MT_24 h PBM	readcount_MT_UFC	log2FoldChange	padj	significant	clade
cytochrome P450 (CYP15A)	RPRC000513	0	0.82016	2.50154	1	FALSE	CYP2
cytochrome P450 (CYP303A)	RPRC000592	2.55734	2.08833	0.2923	1	FALSE	CYP2
cytochrome P450 (CYP306A)/Phantom-fragment	RPRC009372	1.35015	0	2.26155	1	FALSE	CYP2
cytochrome P450 (CYP307A)/spook	RPRC011241	0.789041	13.3044	-4.07789	0.000772468	TRUE	CYP2
cytochrome P450 (CYP306A1)/Phantom-fragment	RPRC009377	ND	ND	ND	ND	ND	CYP2
cytochrome P450 (CYP18A1)	RPRC009370	ND	ND	ND	ND	ND	CYP2
cytochrome P450 (CYP6AJ)	RPRC000261	2.42862	2.06746	0.224772	0.909668	FALSE	CYP3
cytochrome P450 (CYP6AI)	RPRC000176	16224	6759.04	1.26307	5.98712e-42	TRUE	CYP3
cytochrome P450 (CYP6AN)	RPRC008750	18.7312	10.3696	0.85309	0.26615	FALSE	CYP3
cytochrome P450 (CYP6A)	RPRC002590	280.573	2124.33	-2.92119	0.000281385	TRUE	CYP3
cytochrome P450 (CYP6AB)	RPRC013614	45.8484	165.546	-1.84488	0.0518765	TRUE	CYP3
cytochrome P450 (CYP6AA)	RPRC013613	2.28322	12.6576	-2.4458	0.0174706	TRUE	CYP3
cytochrome P450 (CYP6AC)	RPRC008431	29.586	55.7346	-0.941177	0.0160294	FALSE	CYP3
cytochrome P450 (CYP6AE)	RPRC002146	17.6139	120.89	-2.79616	1.2162e-15	TRUE	CYP3
cytochrome P450 (CYP6AFA)	RPRC008405	727.188	2381.56	-1.71092	2.47047e-46	TRUE	CYP3
cytochrome P450 (CYP6I)	RPRC005503	269.894	323.37	-0.262951	0.135419	FALSE	CYP3
cytochrome P450 (CYP6G)	RPRC013597	66.8095	397.815	-2.58897	5.52154e-34	TRUE	CYP3
cytochrome P450 (CYP6P)	RPRC006739	12.9639	28.1225	-1.13245	0.0332809	TRUE	CYP3
cytochrome P450 (CYP6Z)	RPRC006697	1775.2	15573.8	-3.13335	1.12822e-218	TRUE	CYP3
cytochrome P450 (CYP6Y)	RPRC011370	474.508	820.817	-0.790431	0.0238557	FALSE	CYP3
cytochrome P450 (CYP6B)	RPRC006536	349.032	240.286	0.541726	0.000791351	TRUE	CYP3
cytochrome P450 (CYP6V)	RPRC000788	65.3668	15.7119	2.13173	1.24723e-05	TRUE	CYP3
cytochrome P450 (CYP6w)	RPRC000234	164.894	123.816	0.407202	0.0619736	FALSE	CYP3
cytochrome P450 (CYP6M)	RPRC009032	60.0896	7.9507	3.06929	3.63177e-09	TRUE	CYP3
cytochrome P450 (CYP6AL)	RPRC010496	963.251	908.56	0.0824208	0.671006	FALSE	CYP3
cytochrome P450 (CYP6Q)	RPRC004897	68.4079	169.31	-1.30197	5.88404e-09	TRUE	CYP3
cytochrome P450 (CYP6R)	RPRC004888	6.00522	2.89904	1.0506	0.5515	FALSE	CYP3
cytochrome P450 (CYP6I)	RPRC007864	917.498	1840.75	-1.00544	3.52312e-19	TRUE	CYP3
cytochrome P450 (CYP6H)	RPRC007865	2521.59	3828.83	-0.602738	7.52308e-06	TRUE	CYP3
cytochrome P450 (CYP6J)	RPRC000320	330.309	621.629	-0.903	7.91e-12	TRUE	CYP3
cytochrome P450 (6j1-like)	RPRC014313	5.02742	17.0369	-1.7608	0.02119	TRUE	CYP3
cytochrome P450 (CYP6X)	RPRC011368	1491.92	805.118	0.888436	8.68717e-18	TRUE	CYP3
cytochrome P450 (6a13-like)	RPRC011373	77.1649	50.4434	0.629726	0.0481128	TRUE	CYP3
cytochrome P450 (CYP6T)	RPRC000171	33.3226	18.8961	0.856503	0.190105	FALSE	CYP3
cytochrome P450 (6a14-like)	RPRC000005	65.788	31.3245	1.06703	0.00513491	TRUE	CYP3
cytochrome P450 (6j1-like)	RPRC009053	424.608	455.86	-0.103906	0.586259	FALSE	CYP3
cytochrome P450 (CYP6F)	RPRC000046	68.5358	148.003	-1.1786	0.000459597	TRUE	CYP3
cytochrome P450 (CYP6AFB)	RPRC000795	649.666	1659.16	-1.41669	1.07736e-22	TRUE	CYP3
cytochrome P450 (6K1- like)	RPRC001357	0	2.40415	-4.11787	0.137742	FALSE	CYP3
cytochrome P450 (6d3-like)	RPRC001358	0	3.20912	-3.57241	0.137128	FALSE	CYP3
cytochrome P450 (6a14-like)	RPRC002591	92.3218	230.934	-1.38135	4.31289e-06	TRUE	CYP3
cytochrome P450 (6a14-like)	RPRC002592	170.134	714.144	-2.13244	0.00662309	TRUE	CYP3
cytochrome P450 (6B5-like)	RPRC004242	1..149175341	0.402484	1.346	1	FALSE	CYP3
cytochrome P450 (6j1-like)	RPRC004913	234.563	242.032	-0.110463	0.596268	FALSE	CYP3
cytochrome P450 (CYP6N)	RPRC007197	ND	ND	ND	ND	ND	CYP3
cytochrome P450 (CYP6AH)	RPRC007913	1.43647	0.783456	0.787296	0.81727	FALSE	CYP3
cytochrome P450 (CYP46S)	RPRC014138	5.90751	2.4149	2.23901	0.248958	FALSE	CYP3
cytochrome P450 (CYP4X)	RPRC014201	0	1.20404	-2.80679	1	FALSE	CYP3
cytochrome P450 (CYP6AK)	RPRC014708	ND	ND	ND	ND	ND	CYP3
cytochrome P450 (CYP6O)	RPRC004305	211.944	106.882	0.987653	3.76262e-06	TRUE	CYP3
cytochrome P450 (4c3-like)	RPRC015286	30.5112	14.6326	1.04398	0.0749146	FALSE	CYP4
cytochrome P450 (4c3-like)	RPRC015287	115.406	58.2105	0.963534	0.000247196	TRUE	CYP4
cytochrome P450 (CYP4G)	RPRC003227	61.8843	68.5013	-0.14656	0.77997	FALSE	CYP4
cytochrome P450 (CYP4GG)	RPRC013847	0.775613	0.833413	-0.1037	1	FALSE	CYP4
cytochrome P450 (CYP4V)	RPRC002974	9.54053	76.1636	-2.98967	4.78711e-13	TRUE	CYP4
cytochrome P450 (CYP4A)	RPRC000027	35.6078	42.945	-0.245823	0.605744	FALSE	CYP4
cytochrome P450 (CYP4D)	RPRC004769	34.72	119.696	-1.7855	0.000132	TRUE	CYP4
cytochrome P450 (CYP4E)	RPRC004731	213.759	231.248	-0.120287	0.598264	FALSE	CYP4
cytochrome P450 (CYP4F)	RPRC004766	1.27853	14.6692	-3.5202	0.036582	TRUE	CYP4
cytochrome P450 (CYP4H)	RPRC004733	729.733	452.474	0.69074	6.3923e-05	TRUE	CYP4
cytochrome P450 (4C1-like)	RPRC004736	18.7492	30.7423	-0.733675	0.241319	FALSE	CYP4
cytochrome P450 (4C1-like)	RPRC009721	167.812	159.095	0.10962	0.73773	FALSE	CYP4
cytochrome P450 (CYP4I)	RPRC013674	0	1.64413	-3.50694	1	FALSE	CYP4
cytochrome P450 (CYP4T)	RPRC007952	ND	ND	ND	ND	ND	CYP4
cytochrome P450 (CYP4J)	RPRC009968	0.832797	0.413887	1.0087	1	FALSE	CYP4
cytochrome P450 (CYP4M)	RPRC005323	ND	ND	ND	ND	ND	CYP4
cytochrome P450 (CYP4N)	RPRC010477	ND	ND	ND	ND	ND	CYP4
cytochrome P450 (CYP4Z)	RPRC007953	ND	ND	ND	ND	ND	CYP4
cytochrome P450 (CYP4K)	RPRC009967	ND	ND	ND	ND	ND	CYP4
cytochrome P450 (CYP4O)	RPRC007948	0.258538	0.82016	-1.6655	0.97996	FALSE	CYP4
cytochrome P450 (CYP4S)	RPRC007309	26.6585	10.7817	1.284	0.0550734	FALSE	CYP4
cytochrome P450 (CYP4GGG)	RPRC002481	ND	ND	ND	ND	ND	CYP4
cytochrome P450 (4C1-like)	RPRC002131	ND	ND	ND	ND	ND	CYP4
cytochrome P450 (CYP4R)	RPRC007299	0.574259	0	1.309	1	FALSE	CYP4
cytochrome P450 (4g15-like)	RPRC007301	18.2696	4.99301	1.8715	0.040667	TRUE	CYP4
cytochrome P450 (CYP4C1)	RPRC005286	0.28713	0.41008	-0.5142	1	FALSE	CYP4
cytochrome P450 (CYP4U)	RPRC013652	0.502918	0.426666	-0.75147	1	FALSE	CYP4
cytochrome P450 (CYP4Q)	RPRC007304	ND	ND	ND	ND	ND	CYP4
cytochrome P450 (CYP4F2-like)	RPRC000172	ND	ND	ND	ND	ND	CYP4
cytochrome P450 (CYP4C1-like)	RPRC000196	0.759184	3.19495	-2.11313	0.277283	FALSE	CYP4
cytochrome P450 (CYP4C)	RPRC000277	0.501768	0.402484	0.182252	1	FALSE	CYP4
cytochrome P450 (CYP4C1-like)	RPRC002132	1.34684	0	2.54999	1	FALSE	CYP4
cytochrome P450	RPRC003225	0.54471	1.19723	-1.21227	0.710489	FALSE	CYP4
cytochrome P450	RPRC003226	ND	ND	ND	ND	ND	CYP4
cytochrome P450	RPRC004758	0	1.99091	-3.84613	0.190386	FALSE	CYP4
cytochrome P450	RPRC005136	4.3353	3.59403	0.196809	0.897466	FALSE	CYP4
cytochrome P450	RPRC005182	2.07614	1.18988	0.743065	0.74671	FALSE	CYP4
cytochrome P450	RPRC005184	29.7008	16.3568	0.797503	0.143492	FALSE	CYP4
cytochrome P450 (CYP4W)	RPRC007284	ND	ND	ND	ND	ND	CYP4
cytochrome P450 (CYP4P)	RPRC007300	1.33377	1.58896	-0.321642	0.89606	FALSE	CYP4
cytochrome P450	RPRC007305	0.244352	1.59918	-2.56747	0.393484	FALSE	CYP4
cytochrome P450	RPRC007307	0.244352	0.402484	-0.663115	1	FALSE	CYP4
cytochrome P450	RPRC007310	0.257416	0.403307	-0.663115	1	FALSE	CYP4
cytochrome P450 (CYP4Y)	RPRC007947	ND	ND	ND	ND	ND	CYP4
cytochrome P450	RPRC007949	ND	ND	ND	ND	ND	CYP4
cytochrome P450 (4D1-like)	RPRC008267	ND	ND	ND	ND	ND	CYP4
cytochrome P450 (301a1-like)	RPRC001745	46.3301	28.8836	0.714804	0.124456	FALSE	MIT
cytochrome P450 (CYP44A)	RPRC009414	49.8574	215.844	-2.11469	0.0620942	FALSE	MIT
cytochrome P450 (CYP302A)	RPRC011595	68.3114	98.9618	-0.515821	0.0798673	TRUE	MIT
cytochrome P450 (CYP315A)	RPRC006417	71.1486	40.2215	0.858158	0.0169463	TRUE	MIT
cytochrome P450 (CYP334A)	RPRC007082	6.03773	2.48135	1.28724	0.32039	FALSE	MIT
cytochrome P450/Shade	RPRC006945	2.41013	8.34152	-1.80339	0.112543	FALSE	MIT
cytochrome P450 (CYP12A2-like)	RPRC014382	0	0.402484	-1.25001	1	FALSE	MIT

## Sheet: ABC Transporters
ABC binding cassette transporters	VectorBase code	readcount_MT_24 h PBM	readcount_MT_UFC	log2FoldChange	padj	significant
Subfamily A
ABCA	RPRC013724	2910.35	1971.93	0.562014	2.87726e-10	TRUE
ABCA	RPRC000298	49.0872	25.7167	0.933832	0.0301188	TRUE
ABCA	RPRC000640	195.039	261.193	-0.422217	0.0467881	TRUE
ABCA	RPRC002894	ND	ND	ND	ND	ND
ABCA	RPRC002907	0	2.09686	-3.85393	0.188646	FALSE
ABCA	RPRC012842	1.31696	3.32358	-1.33737	0.506474	FALSE
Subfamily B
ABCB	RPRC010031	2697.62	2135.79	0.336843	2.14416e-05	TRUE
ABCB	RPRC012617	ND	ND	ND	ND	ND
ABCB	RPRC010422	1707.18	8242.56	-2.27181	8.75161e-253	TRUE
ABCB	RPRC005587	240.361	380.876	-0.666949	5.0977e-05	TRUE
ABCB	RPRC007049	107.528	173.03	-0.684613	0.000998498	TRUE
ABCB	RPRC015363	ND	ND	ND	ND	ND
ABCB	RPRC013677	507.825	375.935	0.434814	0.00199924	TRUE
ABCB	RPRC014145	0	1.2475	-3.10666	1	FALSE
Subfamily C
ABCC	RPRC001805	5784.37	12648	-1.12882	2.96608e-38	TRUE
ABCC	RPRC001175	358.268	196.195	0.869064	1.11884e-08	TRUE
ABCC	RPRC001174	140.994	84.0982	0.74628	0.00182598	TRUE
ABCC	RPRC002516	4428.66	4044.26	0.130747	0.174256	FALSE
ABCC	RPRC002800	6.3685	1289645201	-1.02404	0.211257	FALSE
ABCC	RPRC008610	2486.12	2279.48	0.125632	0.355751	FALSE
ABCC	RPRC010766	23.9702	39.0754	-0.702964	0.126194	FALSE
ABCC	RPRC014597	158.837	75.6992	1.00874	4.78143e-06	TRUE
ABCC	RPRC014278	1347.84	698.091	0.949108	7.32406e-21	TRUE
Subfamily D
ABCD	RPRC013633	407.12	180.781	1.17074	1.02072e-14	TRUE
ABCD	RPRC007159	2525.87	1759.22	0.521928	5.90396e-10	TRUE
Subfamily E
ABCE	RPRC014798	975.557	820.683	0.185689	0.0864385	FALSE
Subfamily F
ABCF	RPRC004893	687.037	9078.06	-3.72396	0	TRUE
ABCF	RPRC004796	366.3	3811.75	-3.633	2.97034e-260	TRUE
Subfamily G
ABCG	RPRC002190	26.2984	15.3373	0.775312	0.197585	FALSE
ABCG	RPRC002302	10.5227	5.41454	0.958532	0.31644	FALSE
ABCG	RPRC002303	4.31849	1.64333	1.37866	0.408429	FALSE
ABCG	RPRC004060	203.006	14.067	3.84673	5.88819e-31	TRUE
ABCG	RPRC010941	30.6091	13.7591	1.15585	0.036635	TRUE
ABCG	RPRC012709	7.18164	2.49346	1.53106	0.233554	FALSE
ABCG	RPRC014732	40.8797	81.0212	-0.984452	0.00264209	TRUE
Subfamily H
ABCH	RPRC006529	13.9156	4.14268	1.74986	0.0483223	TRUE
ABCH	RPRC001404	0.244352	0.831666	-1.55986	1	FALSE
ABCH	RPRC001408	5.90194	4.20551	0.498601	0.741522	FALSE
ABCH	RPRC002810	8.48735	31.321	-1.87355	0.00354842	TRUE
ABCH	RPRC002839	3.43048	6.25211	-0.868589	0.465106	FALSE
ABCH	RPRC008027	90.1822	361.262	-2.00298	1.70073e-32	TRUE
ABCH	RPRC011760	1049.36	730.829	0.521504	5.4423e-06	TRUE
ABCH	RPRC012399	1.608	0	2.80535	1	FALSE
ABCH	RPRC012378	95.3587	69.5855	0.453015	0.153519	FALSE
ABCH	RPRC014873	1.07636	0.409164	1.26117	1	FALSE
ABCH	RPRC014874	7.62389	6.24621	0.287072	0.796582	FALSE
ABCH	RPRC014892	9.15157	7.07633	0.372518	0.704266	FALSE
ABCH	RPRC015131	17.3498	10.3445	0.746804	0.308253	FALSE
ABCH	RPRC011789	0	0.831666	-2.52169	1	FALSE
ABCH	RPRC012399	1.608	0	2.80535	1	FALSE

## Sheet: Peroxidases and Antioxidants
Peroxidases and Antioxidants	VectorBase code	readcount_MT_24 h PBM	readcount_MT_UFC	log2FoldChange	padj	significant
Heme peroxidase	RPRC005064	9.28789	12.0322	-0.379673	0.657792	FALSE
	RPRC009148	ND	ND	ND	ND	ND
	RPRC004965	150.577	343.38	-1.18847	6.59654e-13	TRUE
	RPRC000982	3.16931	4.98102	-0.656706	0.617478	FALSE
	RPRC006648	308.47	389.88	-0.338377	0.0166498	TRUE
	RPRC012385	2.74013	0.421731	2.62639	0.294579	FALSE
	RPRC012999	6.47096	25.8024	-1.98735	0.00110604	TRUE
	RPRC005268	328.842	609.545	-0.891365	5.37658e-13	TRUE
	RPRC013394	49.4495	59.4294	-0.264833	0.461065	FALSE
	RPRC005064	9.28789	12.0322	-0.379673	0.657792	FALSE
	RPRC008321	2.83908	0	3.63288	0.123009	FALSE
Peroxiredoxin	RPRC015388	9291.5	38562.1	-2.05333	1.12396e-88	TRUE
	RPRC015401	3608.25	1226.08	1.55731	3.47729e-83	TRUE
Thioredoxin peroxidase (TrX)	RPRC012922	1206.17	935.878	0.365324	0.000550191	TRUE
	RPRC007595	324.45	964.252	-1.57338	2.30338e-45	TRUE
	RPRC011126	815.45	410.139	0.990898	2.47774e-13	TRUE
Glutathione peroxidase (GPx)	RPRC015008	1413.86	1842.78	-0.382303	5.66422e-06	TRUE
	RPRC011108	445.74	342.75	0.410871	0.00533491	TRUE
Xanthine dehydrogenase (XDH)	RPRC011533	6489.91	4987.64	0.379875	2.31444e-06	TRUE
Superoxide dismutase (sod)	RPRC004717	156.162	289.691	-0.893812	6.09289e-07	TRUE
	RPRC011796	175.8	849.103	-2.27401	6.12153e-73	TRUE
Catalase (Cat)	RPRC009934	4976.09	1875.65	1.4075	3.24637e-85	TRUE
	RPRC007907	4936.4	1716.88	1.52355	3.03858e-82	TRUE
RHBP	RPRC004408	2144.49	2597.61	-0.276527	0.553073	FALSE

## Sheet: JH and Ec Signaling
Juvenile hormone (JH) signaling	VectorBase code	readcount_MT_24 h PBM	readcount_MT_UFC	log2FoldChange	padj	significant
Methoprene-tolerant (Met) -fragment	RPRC007000	43.0866	83.2068	-0.947736	0.000930783	TRUE
Kruppel (Kr-h1)	RPRC014398	0.531646	0	1.21001	1	FALSE
Acetyl-coa acetyltransferase, mitochondrial (ACoA-thiolase)	RPRC007496	4326.62	1283.75	1.75253	4.27559e-90	TRUE
3-Hydroxy-3-methylglutaryl-CoA synthase (HMGS)	RPRC007884	346.473	178.038	0.961384	2.94011e-09	TRUE
Mevalonate kinase (MevKin)	RPRC014277	232.917	196.391	0.247148	0.19406	FALSE
Phosphomevalonate kinase (P-MevKin)	RPRC006212	475.164	388.451	0.291077	0.0333597	TRUE
Diphosphomevalonate decarboxylase (PP-MevDec)	RPRC012093	657.775	294.224	1.16067	7.67113e-23	TRUE
Isopentenyl diphosphate synthase (IPPI)	RPRC003718	135.547	51.1284	1.406	1.90533e-08	TRUE
Farnesyl diphosphate synthase (FPPS)	RPRC014226	924.75	1372.85	-0.570102	5.39873e-10	TRUE
Farnesyl pyrophosphatase (FPPase)	RPRC004412	90.2257	75.7595	0.250695	0.42949	FALSE
Farnesol dehydrogenase (FOLD)	RPRC010547	344.792	1952.21	-2.50136	1.00189e-142	TRUE
farnesal dehydrogenase (FALDH)	RPRC002910	4103.5	1412.32	1.53857	9.4072e-69	TRUE
JH epoxide hydrolase (JHEH)	RPRC009604	7711.38	5790.83	0.413175	2.27676e-07	TRUE
Juvenile hormone acid methyltransferase (JHAMT)-like	RPRC004476	10.2279	8.35999	0.29329	0.773056	FALSE
Juvenile hormone acid methyltransferase (JHAMT)-like	RPRC011659	1.37671	8.69832	-2.75898	0.0318539	TRUE
Methyl farneseoate epoxidase (Epox)	RPRC000513	ND	ND	ND	ND	ND
Ecdysteroids (Ec) signaling	VectorBase code	readcount_MT_24 h PBM	readcount_MT_UFC	log2FoldChange	padj	significant
Ec receptor (EcR)	RPRC014174	47.9869	21.6479	1.15079	0.00568628	TRUE
Ultra spiracle protein (USP)	RPRC013330	116.071	97.7491	0.250025	0.37832	FALSE
Br-C	RPRC003967	209.322	218.799	-0.126734	0.507845	FALSE
FTZ-F1	RPRC002968	346.796	362.89	-0.126787	0.484554	FALSE
HR3	RPRC003681	1.608	0	2.80535	1	FALSE
HR4	RPRC012796	62.0048	41.2965	0.524661	0.187821	FALSE
E75B	RPRC000853	330.396	352.51	-0.0951848	0.646492	FALSE
E74-like	RPRC007565	76.5892	108.972	-0.572894	0.0247815	TRUE
E78C	RPRC009045	ND	ND	ND	ND	ND
Ec 26-hydroxylase	RPRC009370	ND	ND	ND	ND	ND
Neverland	RPRC001631	3.35391	0	3.87338	0.0815879	FALSE
spook (spo)	RPRC011241	0.789062	13.2774	-4.07789	0.000772468	TRUE
Phantom (phm) - frgamnet	RPRC009372	1.10623	0	2.26155	1	FALSE
Phantom (phm) - frgamnet	RPRC009377	ND	ND	ND	ND	ND
Diesmbodied (dib)	RPRC011595	68.9247	98.9618	-0.515821	0.0798673	FALSE
Shadow	RPRC006417	71.4276	40.2215	0.858158	0.0169463	TRUE
Shade	RPRC006945	2.41013	8.34152	-1.80339	0.112543	FALSE

## Sheet: Circadian Rhythm 
Circadian Rhythm genes	VectorBase code	readcount_MT_24 h PBM	readcount_MT_UFC	log2FoldChange	padj	significant
timeless (tim)	RPRC008008	225.13	259.58	-0.203252	0.269507	FALSE
period (per)	RPRC000427	441.733	1304.54	-1.56487	2.99861e-42	TRUE
Clock (Clk)	RPRC002110	168.368	136.618	0.30906	0.137757	FALSE
Cycle (cyc)	RPRC000556	60.5633	37.2783	0.669876	0.0579508	FALSE
vrille (vri)	RPRC000393	107.946	169.05	-0.657736	0.00129919	TRUE
PAR-domain protein 1 (Pdp1)	RPRC000236	976.239	240.847	2.0214	2.51706e-63	TRUE
clockwork orange (cwo)	RPRC000455	125.859	101.829	0.304764	0.224857	FALSE
Glycogen synthase kinase 3 (GSK3)	RPRC000333	934.841	599.78	0.639914	4.61529e-08	TRUE
casein kinase 1 gamma (ck1γ)	RPRC011511	254.23	155.61	0.708709	0.000272751	TRUE
casein kinase 1 epsilon (ck1ε)	RPRC000167	489.336	265.443	0.88332	4.67435e-10	TRUE
Casein kinase 2 alpha subunit (ck2α)	RPRC003853	291.14	119.784	1.29238	8.48787e-14	TRUE
Casein kinase 2 alpha subunit (ck2α)	RPRC010391	221.37	134.199	0.720908	0.000110416	TRUE
Casein kinase 2 beta subunit (ck2β)	RPRC007812	704.93	3064.74	-2.12019	4.506e-147	TRUE
serine/threonine protein phosphatase 2a (Pp2a)	RPRC000584	3460.17	8878.43	-1.35928	5.21558e-67	TRUE
serine/threonine-protein phosphatase 1 alpha (Pp1a)	RPRC000214	472.469	151.982	1.64405	9.45961e-26	TRUE
serine/threonine-protein phosphatase 1 alpha (Pp1a)	RPRC002352	1223.29	5381.97	-2.13688	4.23371e-182	TRUE
Pp1a-fragment	RPRC012904	28.9195	58.4717	-1.05575	0.0149516	TRUE
F box protein Jetlag (jet)-fragment	RPRC000510	155.562	690.464	-2.14919	6.09722e-59	TRUE
supernumerary limbs (slmb)	RPRC008429	342.34	131.215	1.38522	1.06778e-15	TRUE
nemo/serine/threonine-protein kinase (nmo)-Fragement	RPRC000184	28.9872	14.6724	0.972095	0.085541	FALSE
EGF domain-specific O-linked N-acetylglucosamine transferase (Eogt)	RPRC007338	346.338	592.195	-0.774869	3.15326e-09	TRUE
Narrow abdomen (na)	RPRC007564	162.367	176.311	-0.115425	0.602528	FALSE
ataxin-2	RPRC000939	419.651	333.506	0.332018	0.0456352	FALSE
circadian trip (ctrip)	RPRC008959	1770.33	1430.87	0.307035	0.000327484	TRUE
alien	RPRC011808	567.066	277.438	1.03254	7.50684e-17	TRUE
Calcium-activated potassium channel slowpoke (dSlo) Fragment	RPRC002904	76.2284	211.335	-1.53988	5.81879e-12	TRUE
single-minded (sim)	RPRC001595	1.25022	0	2.45195	1	FALSE
Polyadenylate-binding protein 2 (Pabp2)	RPRC008620	1256.05	1592.28	-0.341852	7.7414e-05	TRUE
takeout (to)	RPRC010098	0.244381	4.21444	-4.1081	0.31372	FALSE
takeout (to)	RPRC002313	2.18402	3.74571	-0.82562	0.629152	FALSE
takeout (to)	RPRC010096	2.28512	12.6494	-4.9582	0.000395347	TRUE

## Sheet: Carbohydrate Metabolism 
Carbohysrate Metabolism	VectorBase code	readcount_MT_24 h PBM	readcount_MT_UFC	log2FoldChange	padj	significant
Glycolytic-Krebs cycle
Hexokinase 1	RPRC003961	643.497	1712.02	-1.4334	4.9288e-52	TRUE
Hexokinase 2	RPRC012174	561.227	2699.3	-2.26699	4.22758e-138	TRUE
phosphofructokinase 2 (PFK2)	RPRC005099	1014.61	1029.96	-0.02219	0.89331	FALSE
glucose 6-phosphate isomerase	RPRC011963	1861.41	1617.92	0.202486	0.03276	FALSE
Fructose-bisphosphate aldolase	RPRC009817	19.3791	4.18229	2.2121	0.0042757	TRUE
Fructose-bisphosphate aldolase	RPRC009816	6453.38	22600	-1.80839	2.35553e-77	TRUE
Glucose-6-phosphate 1-epimerase	RPRC005141	341.97	383.936	-0.163528	0.276925	FALSE
triose phosphate isomerase	RPRC004460	2387.54	5670.56	-1.24831	4.13849e-65	TRUE
glycerol-3-phosphate dehydrogenase	RPRC000813	ND	ND	ND	ND	ND
glycerol-3-phosphate dehydrogenase	RPRC006715	ND	ND	ND	ND	ND
Glycerol Kinase 3	RPRC006889	632.535	2334.45	-1.88548	4.66264e-86	TRUE
Glycerol Kinase 5	RPRC009748	271.611	141.871	0.95805	4.306e-08	TRUE
Glycerol Kinase 3	RPRC010817	816.14	1019.77	-0.322243	0.00560516	TRUE
Glycerol Kinase 3	RPRC010944	3027.31	3404.53	-0.169495	0.104727	FALSE
phosphoglycerate kinase (PGK1)	RPRC011161	1425.42	1555.35	-0.12668	0.286365	FALSE
phosphoglycerate mutase	RPRC013541	109.041	66.7757	0.721718	0.00527498	TRUE
phosphoglycerate mutase	RPRC005826	1294.69	2258.13	-0.803019	2.05119e-21	TRUE
Enolase (ENO)	RPRC013484	10999.2	30445.6	-1.46899	1.15528e-82	TRUE
pyruvate kinase	RPRC006550	1251.08	2323.88	-0.892888	1.4952e-17	TRUE
pyruvate kinase	RPRC010945	27.8883	18.1178	0.557454	0.308245	FALSE
deoxyribose-phosphate aldolase	RPRC003474	957.779	386.712	1.30816	3.26419e-26	TRUE
phosphoglucomutase 2	RPRC002922	2390.09	1870.47	0.353753	1.43173e-05	TRUE
phosphoglucomutase 1	RPRC011959	1308.71	222.198	2.55329	1.64007e-81	TRUE
transaldolase	RPRC010552	1403.15	1267.51	0.147324	0.10782	FALSE
fructose-1,6-bisphosphatase	RPRC005550	1.081	1.64793	-0.645814	0.806156	FALSE
fructose-1,6-bisphosphatase 1	RPRC005553	988.744	763.344	0.371395	0.00240551	TRUE
fructose-1,6-bisphosphatase	RPRC010227	ND	ND	ND	ND	ND
glucose-6-phosphatase (G6pase)	RPRC014550	22.3215	33.0457	-0.60904	0.22444	FALSE
pyruvate carboxylase mitochondria isoform	RPRC008452	589.374	5431.25	-3.20469	4.15061e-254	TRUE
phosphoenolpyruvate carboxykinase	RPRC010918	4615.61	1260.49	1.8732	3.2966e-16	TRUE
Trehalose metabolism
TRET	RPRC007957	4.10378	0.84346	2.29967	0.230303	FASLE
Trehalose-6-phosphate synthase	RPRC003010	224.688	67.0449	1.74594	1.08416e-15	TRUE
TRE-2 (membrane)	RPRC004614	269.782	238.665	0.177243	0.324969	FALSE
TRE-1 (soluble)	RPRC012647	61.0747	215.574	-1.82035	1.88946e-19	TRUE
